# Supplementary material for: Economic Evaluation of Nemonoxacin, Moxifloxacin and Levofloxacin in the Treatment of Early Community-Acquired Pneumonia with Possible Pulmonary Tuberculosis
Source: MDPI journal article supplement (doi:10.3390/ijerph19084816), 2022-04-15
Supplement: s1 [file s1]

## Supplementary Materials

- Table S1 Basic information of clinical research (pages 2)
- Table S2 Dosing regimen (pages 2)

**Table S1 Basic information of clinical research**

| Group<br>drug dosing(number of patients)    | Phase II nemonoxacin<br>500mg (63)          | Phase II<br>moxifloxacin 500mg<br>(60)      | Phase III nemonoxacin<br>500mg (312)        | Phase III levofloxacin<br>500mg (166)       |
|---------------------------------------------|---------------------------------------------|---------------------------------------------|---------------------------------------------|---------------------------------------------|
| Age (mean and standard deviation)           | 52.7(15.33)                                 | 51.6(16.00)                                 | 57.8(14.18)                                 | 56.5(14.62)                                 |
| Male (proportion of males,%)                | 62.7                                        | 64.1                                        | 62.1                                        | 62.7                                        |
| Ethnicity (Proportion of Han nationality,%) | 92.5                                        | 95.3                                        | 96.8                                        | 97.6                                        |
| Height (cm)                                 | 163.5(7.08)                                 | 164.7(8.68)                                 | 164.9 (7.57)                                | 165.5 (6.88)                                |
| Weight (kg)                                 | 60.0(8.45)                                  | 64.3(11.81)                                 | 62.4 (10.60)                                | 62.7 (10.69)                                |
| BMI(kg/m2)                                  | 22.5(3.01)                                  | 23.6(3.29)                                  | 22.9 (3.18)                                 | 22.8 (3.23)                                 |
| Pneumonia Severity Index score              | Level 2: 46.3%,Level 3: 50.7%,Level 4: 3.0% | Level 2: 46.9%,Level 3: 45.3%,Level 4: 7.8% | Level 2: 24.2%,Level 3: 70.1%,Level 4: 5.7% | Level 2: 26.5%,Level 3: 66.9%,Level 4: 6.6% |
| Smoking (proportion of non-smokers,%)       | 67.2                                        | 67.2                                        | 59.6                                        | 54.8                                        |
| Drinking (proportion of non-drinkers,%)     | 80.6                                        | 60.9                                        | 69.4                                        | 63.9                                        |
| Microbiologically proven infection (%)      | 56.7                                        | 60.9                                        | 60.5                                        | 53.0                                        |
| Chronic obstructive pulmonary disease (%)   | 9.0                                         | 4.7                                         | 15.3                                        | 13.3                                        |
| Cardiovascular disease (%)                  | 9.0                                         | 1.6                                         | 6.4                                         | 5.4                                         |

**Table S2 Dosing regimen**

| Drug                | Injection                                                                                                 | Sequential drugs                                                                                        |
|---------------------|-----------------------------------------------------------------------------------------------------------|---------------------------------------------------------------------------------------------------------|
| Nemonoxacin         | Nemonoxacin malate and sodium chloride injection (Zhejiang Medicine) 250ml,0.5g<br>Once a day,intravenous | Nemonoxacin malate capsules (Zhejiang Medicine) 0.25g/per capsule<br>Once a day,2 capsules each time    |
| Moxifloxacin        | Moxifloxacin hydrochloride and sodium Chloride Injection (Bayer) 250ml,0.4g<br>Once a day,intravenous     | Moxifloxacin hydrochloride tablets (Bayer) 0.4g/per tablet<br>Once a day,1 capsule each time            |
| Levofloxacin        | Levofloxacin sodium chloride injection (Daiichi Sankyo) 100ml,0.5g<br>Once a day,intravenous              | Levofloxacin sodium chloride tablets (Daiichi Sankyo) 0.4g/per tablet<br>Once a day,1 capsule each time |
| Second-line therapy | Linezolid for injection (Pfizer) 300ml: 600mg/13.7g<br>Tigecycline (WyethLederleS.r.l.) 50mg 0.1g daily   | 1.2g per day                                                                                            |
